# Supplementary material for: Spherical graphite produced from waste semi-coke with enhanced properties as an anode material for Li-ion batteries
Source: Royal Society of Chemistry journal article supplement (doi:10.1039/c9se00606k), 2019-01-01
Supplement: c9se00606k1.pdf [file c9se00606k1.pdf]

# Spherical graphite produced by waste semi-coke with enhanced properties as anode material for Li-ion batteries

Ming Shi, Zige Tai, Na Li, Kunyang Zou, Yuanzhen Chen, Junjie Sun, Yongning Liu\*

State Key Laboratory for Mechanical Behavior of Materials, School of Material Science and Engineering, Xi'an Jiaotong University, Xi'an 710049, PR China

\*Corresponding author E-mail address: [ynliu@mail.xjtu.edu.cn](mailto:ynliu@mail.xjtu.edu.cn)

Fax: +86 29 8266 3453; Tel: +86 29 8266 4602

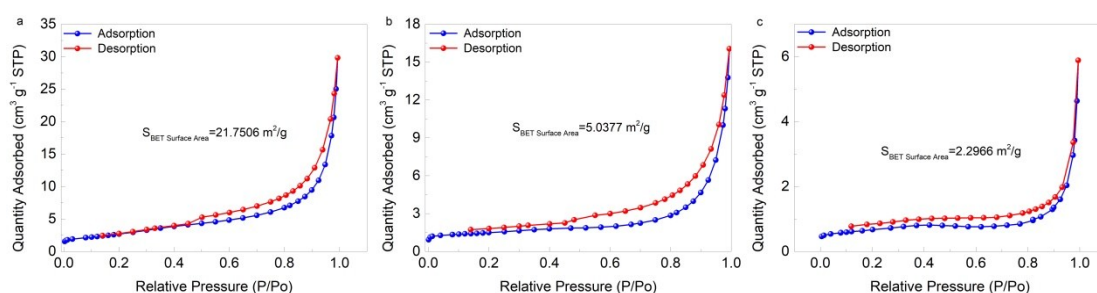

Fig. 1 N<sub>2</sub> absorption/desorption profiles of (a) pristine semi-coke (SC); (b) synthetic graphite without Si (PG); and (c) synthetic graphite with 10% Si at 2300 °C (SG).

**Table 1** The percentage of impurity of pristine SC and SG (10% Si at 2300 °C).

| samples | Content percentage / wt % |      |     |     |      |      |      |      |
|---------|---------------------------|------|-----|-----|------|------|------|------|
|         | B                         | Si   | Al  | Ca  | Fe   | K    | Na   | Mg   |
| SC      | <0.1                      | 4.25 | 5.5 | 3.3 | 0.8  | 0.3  | 0.09 | <0.1 |
| SG      | <0.1                      | 1.01 | 1.9 | 0.1 | <0.1 | 0.02 | 0.03 | <0.1 |

**Table 2** The SG capacity values with that of similar materials published in the literature.

| Materials                                                                                | Specific Capacity<br>[mA h g <sup>-1</sup> ] | Rate capability<br>[mA h g <sup>-1</sup> ]                     | Cyclic retention                                                                     | Ref.      |
|------------------------------------------------------------------------------------------|----------------------------------------------|----------------------------------------------------------------|--------------------------------------------------------------------------------------|-----------|
| Spherical graphite produced by waste semi-coke                                           | 347.06 at 0.05C                              | 329.8 at 0.1C; 317.4 at 0.5 C and 262.3 at 1C                  | 97.7% at 0.5C after 700 cycles                                                       | This work |
| Iron-catalyzed graphitic materials from biomass                                          | 306 at 0.1C                                  | 150 at rate of 2C                                              | Over 90 % after 200 cycles                                                           | 1         |
| Carbonaceous composites prepared by the mixture of graphite, cokes, and petroleum pitch. | 312 at 0.2C                                  | 149 at 1 C; 78 at 5C                                           | -                                                                                    | 2         |
| An oxidation procedure to by-products of the petroleum industry                          | 385 after 20 cycles at C/50                  | -                                                              | -                                                                                    | 3         |
| Needle coke refined by molten caustic leaching                                           | 560.137 at 0.9 mA                            | -                                                              | 98.5% after 50 cycles                                                                | 4         |
| Surface-fluorinated petroleum cokes                                                      | 306 at 60 mA g <sup>-1</sup>                 | -                                                              | 98% after 10 <sup>th</sup> cycles                                                    | 5         |
| Anthracite                                                                               | 370 at 30 mA g <sup>-1</sup>                 | -                                                              | Nearly 100% after 20 cycles                                                          | 6         |
| Coating of graphite anode with coal tar pitch                                            | 361 at 0.1C                                  | 361 at 0.2C; 357 at 0.5C; 355 at 1C; 348 at 2C; 298 at 5C      | 83% at 5C                                                                            | 7         |
| Porous carbon microspheres anode materials from fine needle coke powders                 | 394 at 50 mA g <sup>-1</sup>                 | 315 at 500 mA g <sup>-1</sup> ; 160 at 1000 mA g <sup>-1</sup> | range from 340 to 350 mA h g <sup>-1</sup> at 50 mA g <sup>-1</sup> after 100 cycles | 8         |
| Synthetic graphite from bituminous coal                                                  | 310.3 at 0.1C                                | 143.9 at 5C                                                    | Over 95.3% after 100 cycles                                                          | 9         |
| Synthetic graphite from semi-coke powders                                                | 351.5 at 0.1C                                | 322 at 1C                                                      | 97.6% after 300 cycles at 1C                                                         | 10        |
| Carbon nanofiber/graphite compounds                                                      | 359 at 0.1C                                  | 299 at 1C                                                      | 99.4% after 50 cycles at 0.1C and 90% after 300 cycles at 1C                         | 11        |
| Different series of coal ash treated at 2700 °C                                          | -                                            | -                                                              | 310 mA h g <sup>-1</sup> after 50 cycles at 0.1C                                     | 12        |

## References

- 1 G. M. Aurora, M. F. Julian, R. Mirco, H. Andreas, W. Martin, P. Tobias and R. R. Joaquin, Iron-Catalyzed Graphitic Carbon Materials from Biomass Resources as Anodes for Lithium-Ion Batteries, *ChemSusChem*, 2018, **11**, 2776-2787.
- 2 D. Y. Park and D. Y. Park, High rate capability of carbonaceous composites as anode electrodes

- for lithium-ion secondary battery, *J. Ind. Eng. Chem.*, 2009, **15**, 588-594.
- 3 A. Concheso, R. Santamaria and R. Menendez, Effect of oxidation on the performance of low-temperature petroleum cokes as anodes in lithium ion batteries, *J. Appl. Electrochem.*, 2009, **39**, 899-906.
- 4 H. G. Kang, J. K. Park and B. S. Han, Electrochemical characteristics of needle coke refined by molten caustic leaching as an anode material for a lithium-ion battery, *J. Power Sources*, 2006, **153**, 170-173.
- 5 T. Nakajima, J. L. Li and K. Naga, Surface structure and electrochemical properties of surface-fluorinated petroleum cokes for lithium ion battery, *J. Power Sources*, 2004, **133**, 243-251.
- 6 Y. J. Kim, H. J. Yang and S. H. Yoon, Anthracite as a candidate for lithium ion battery anode, *J. Power Sources*, 2003, **113**, 157-165.
- 7 Y. J. Han, J. Kim and Y. J. Seong, Coating of graphite anode with coal tar pitch as an effective precursor for enhancing the rate performance in Li-ion batteries: Effects of composition and softening points of coal tar pitch, *Carbon*, 2015, **94**, 432-438.
- 8 W. F. Ren, Z. L. Zhang and Y. H. Wang, Preparation of porous carbon microspheres anode materials from fine needle coke powders for lithium-ion batteries, *RSC Adv.*, 2015, **5**, 11115-11123.
- 9 B. L. Xing, C. T. Zhang, Y. J. Cao, G. X. Huang, Q. R. Liu, C. X. Zhang, Z. F. Chen, G. Y. Yi, L. J. Chen and J. L. Yu, Preparation of synthetic graphite from bituminous coal as anode materials for high performance lithium-ion batteries, *Fuel Pro. Tech.*, 2018, **172**, 162-171.
- 10 M. Shi, Y. Z. Chen, H. Wen and Y. N. Liu, One-step heat treatment to process semi-coke powders as an anode material with superior rate performance for Li-ion batteries, *RSC Adv.*,

2018, **8**, 41207-41217.

- 11 S. M. Jang, J. Miyawaki and M. Tsuji, Preparation of a carbon nanofiber/natural graphite composite and an evaluation of its electrochemical properties as an anode material for a Li-ion battery, *New Res. Carbon Mater.*, 2010, **25**, 89–96.
- 12 I. Camean and A. B. Garcia, Graphite materials prepared by HTT of unburned carbon from coal combustion fly ashes: Performance as anodes in lithium-ion batteries, *J. Power Sources*, 2011, **196**, 4816–4820.
